# Supplementary material
Source: PubMed Central journal article supplement (PMC4556280)
Supplement: NIHMS718793-supplement-Suppl_Materials.pdf [file NIHMS718793-supplement-Suppl_Materials.pdf]

## **Scaffold function of long noncoding RNA *HOTAIR* in protein ubiquitination**

**Je-Hyun Yoon<sup>1,\*</sup>, Kotb Abdelmohsen<sup>1</sup>, Jiyoung Kim<sup>1</sup>, Xiaoling Yang<sup>1</sup>, Jennifer L. Martindale<sup>1</sup>, Kumiko Tominaga-Yamanaka<sup>1</sup>, Elizabeth J. White<sup>2</sup>, Arturo V. Ojalo<sup>3</sup>, John L. Rinn<sup>4</sup>, Stefan G. Kreft<sup>5</sup>, Gerald M. Wilson<sup>2</sup>, and Myriam Gorospe<sup>1</sup>**

<sup>1</sup>Laboratory of Genetics, National Institute on Aging-Intramural Research Program, NIH, Baltimore, MD 21224, USA;

<sup>2</sup>Department of Biochemistry and Molecular Biology and Marlene and Stewart Greenebaum Cancer Center, University of Maryland School of Medicine, Baltimore, MD 21201, USA;

<sup>3</sup>Biosearch Technologies, Inc., Novato, CA 94949, USA;

<sup>4</sup>Department of Stem Cell and Regenerative Biology, Harvard University, Cambridge, MA 02138, USA

<sup>5</sup>Department of Biology, University of Konstanz, 78457 Konstanz, Germany

\*Correspondence:

LG, NIA-IRP, NIH

251 Bayview Blvd.

Baltimore, MD 21224, USA

Tel: 410-558-8590 (JHY); Fax: 410-558-8386

*yoonyehyun@gmail.com*

## SUPPLEMENTARY FIGURES

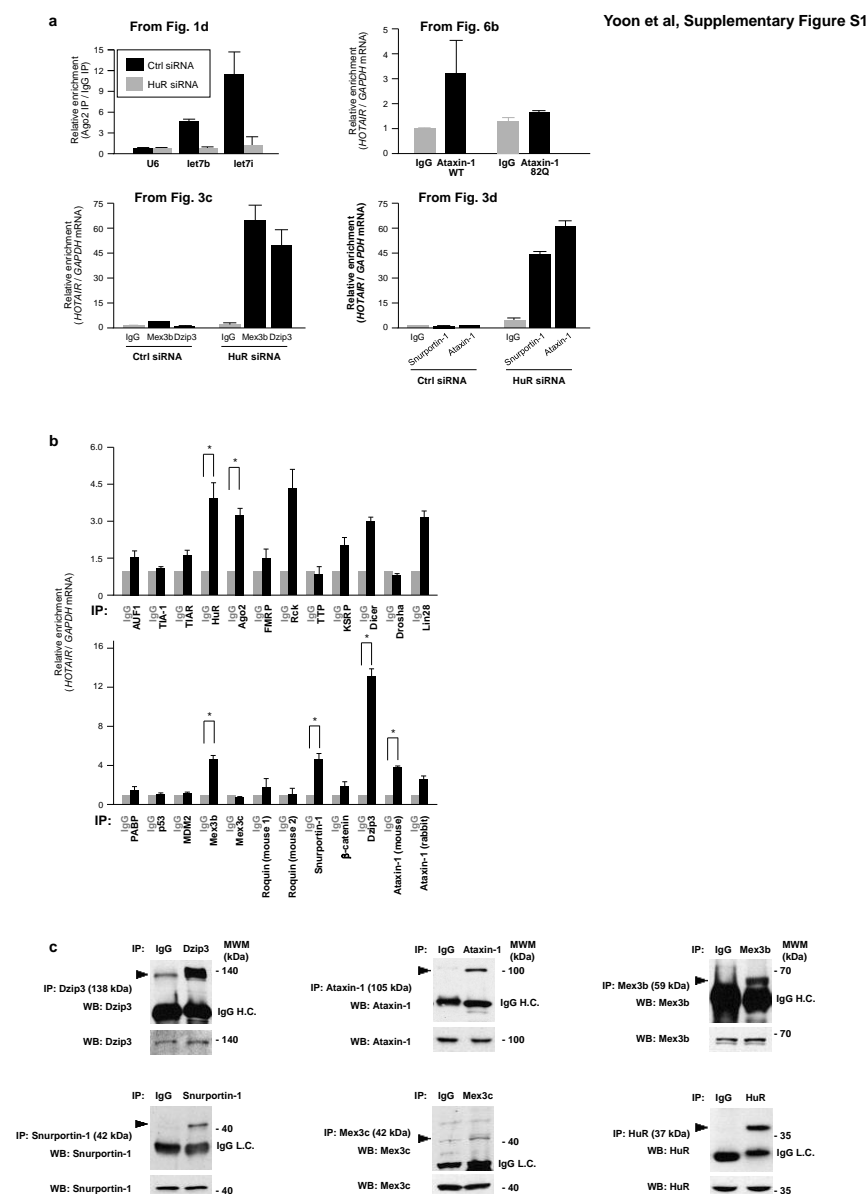

**Supplementary Figure S1. Survey of RNA-binding proteins associated with *HOTAIR* and IP control assays.** (a) Alternative manner of representing RIP assays used in the main article, where the RNA enrichments in the IgG samples are not set as 1.0 but are set relative to the IgG in the respective control group. The graphs represent the means and S.D. from 3 independent experiments. (b) RIP analysis of the interaction of *HOTAIR* with a panel of RBPs in HeLa cell lysates. Antibodies recognizing the RBPs shown were used for IP in each case; control IP reactions were carried out using a corresponding IgG. *HOTAIR* levels were measured by RT-qPCR and normalized to the levels of *GAPDH* mRNA levels in the same IP samples measured by RT-qPCR analysis. Data were quantified as enrichment of *HOTAIR* in the RBP IP relative to the IgG IP. The graphs represent the means and S.D. from 3 independent experiments. \*,  $P < 0.05$  using Student's *t*-test. (c) Using HeLa cell lysates, the quality of the IP reactions was assayed by Western blot (WB) analysis of Dzip3, Ataxin-1, Mex3b, Mex3c, HuR, and Snurportin-1. Lysates were tested by WB analysis before (lower images for each protein tested) and after IP (top panels for each protein tested). IgG H.C., immunoglobulin heavy chain, IgG L.C., immunoglobulin light chain. Larger fields of blots are shown in Supplementary Figure S7.

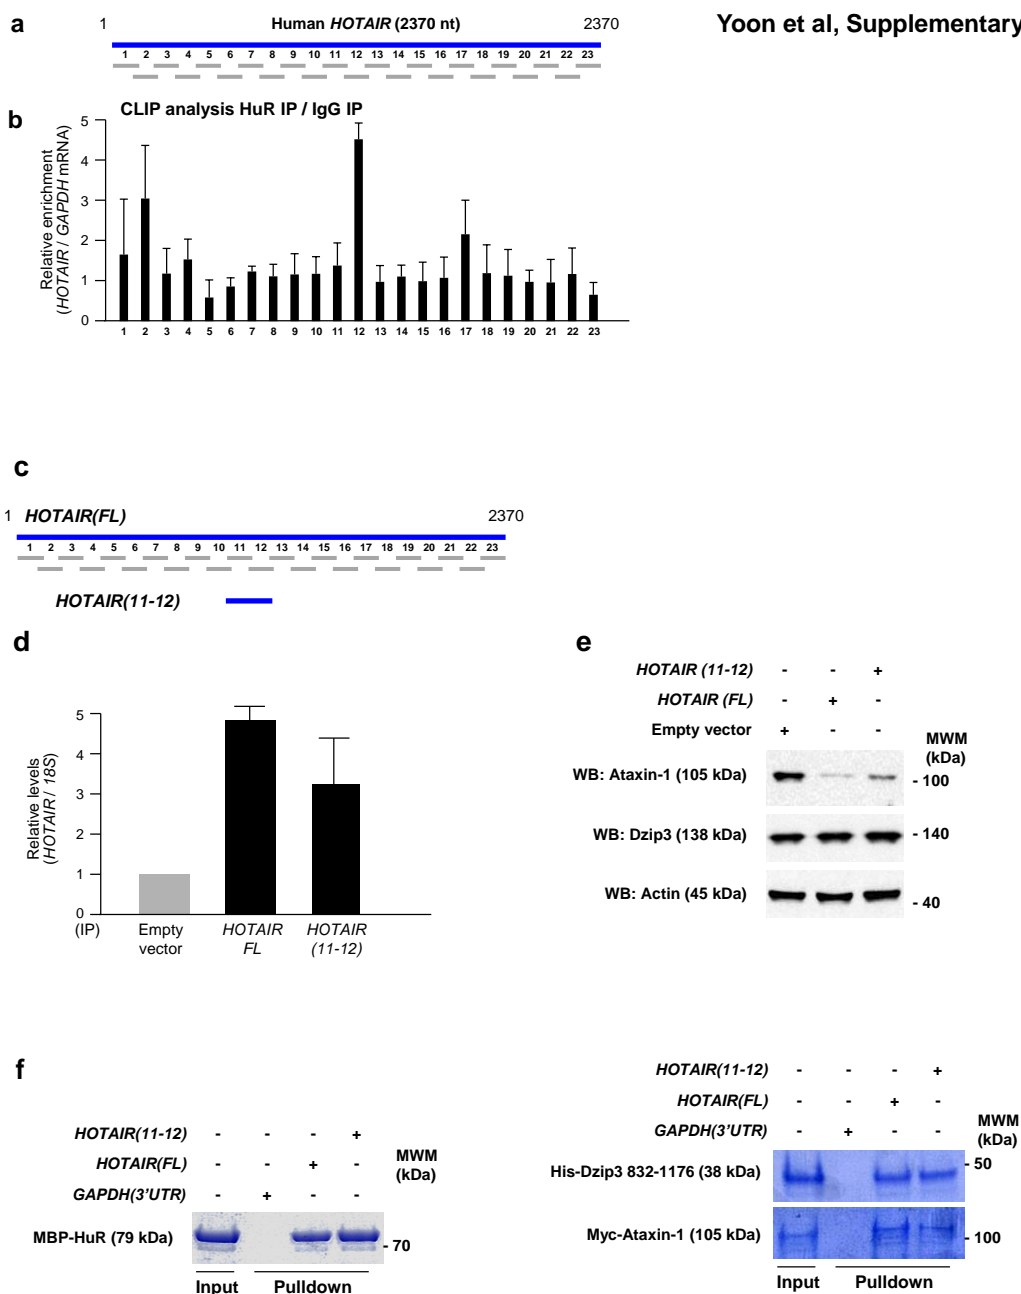

**Supplementary Figure S2. Additional characterization of the interaction of *HOTAIR* with HuR, Dzip3, and Ataxin-1.** (a,b) Schematic of *HOTAIR* (a) and the segments tested by CLIP analysis (b) following the procedure described in the Methods section, using 10  $\mu$ g antibody and 15 mg of crosslinked lysate. (c) A plasmid expressing only segments 11 and 12 of *HOTAIR* (spanning nucleotide positions ~1028-1272, short blue line) was constructed and expressed in HeLa cells. (d,e) Forty-eight hours after transfecting HeLa cells with plasmids to express full-length [*HOTAIR(FL)*] or partial *HOTAIR* [*HOTAIR(11-12)*], as assessed by RT-qPCR (d), the levels of endogenous Ataxin-1, Dzip3, and Actin were determined by Western blot analysis (e). (f) Biotin pulldown analysis to determine the interaction of MBP-HuR (left) or His-Dzip3 (RNA binding domain) or Myc-Ataxin-1 (right) with biotinylated *HOTAIR(FL)*, *HOTAIR(11-12)* or control *GAPDH(3'UTR)*. In (b,d), the graphs reflect the means and S.D. from 3 independent experiments. Larger fields of blots are shown in Supplementary Figure S7.

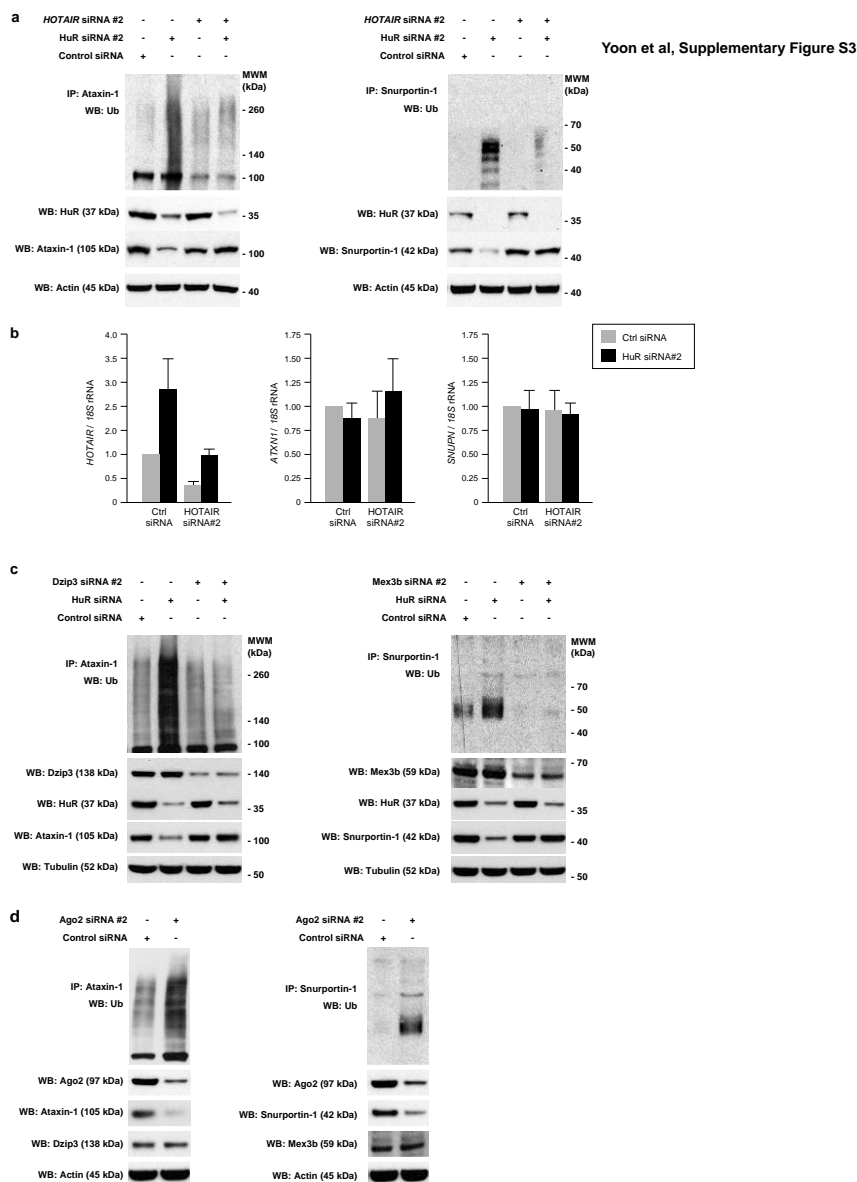

**Supplementary Figure S3. Effects of additional *HOTAIR*- or HuR-directed siRNAs.** (a) Forty-eight h after silencing HuR with siRNA#2 (Methods), the levels of HuR, Ataxin-1, Snurportin-1, and loading control Actin were assessed by Western blot analysis; the levels of ubiquitinated Ataxin-1, and ubiquitinated Snurportin-1, were assessed by IP of Ataxin-1 or Snurportin followed by ubiquitin Western blot analysis. (b) Forty-eight h after silencing *HOTAIR* with siRNA#2 (Methods) in the presence of either Ctrl siRNA or HuR siRNA#2, the levels of *HOTAIR*, *ATXN1* mRNA, and *SNUPN* mRNA relative to *18S* rRNA were assessed by RT-qPCR analysis. Data are the means and S.D. from 3 independent experiments. (c) Forty-eight h after silencing Dzip3 or Mex3b with siRNA#2 (Methods), the levels of HuR, Dzip3, Mex3b, Ataxin-1, Snurportin-1, and loading control Tubulin were assessed by Western blot analysis; the levels of ubiquitinated Ataxin-1, and ubiquitinated Snurportin-1, were assessed by IP of Ataxin-1 or Snurportin-1 followed by ubiquitin Western blot analysis. (d) Forty-eight h after silencing Ago2 with siRNA#2, the levels of Ago2, Dzip3, Mex3b, Ataxin-1, Snurportin-1, and loading control Actin were assessed by Western blot analysis; the levels of ubiquitinated Ataxin-1, and ubiquitinated Snurportin-1, were assessed by IP of Ataxin-1 or Snurportin followed by ubiquitin Western blot analysis. Larger fields of blots are shown in Supplementary Figure S7.

Yoon et al, Supplementary Figure S4

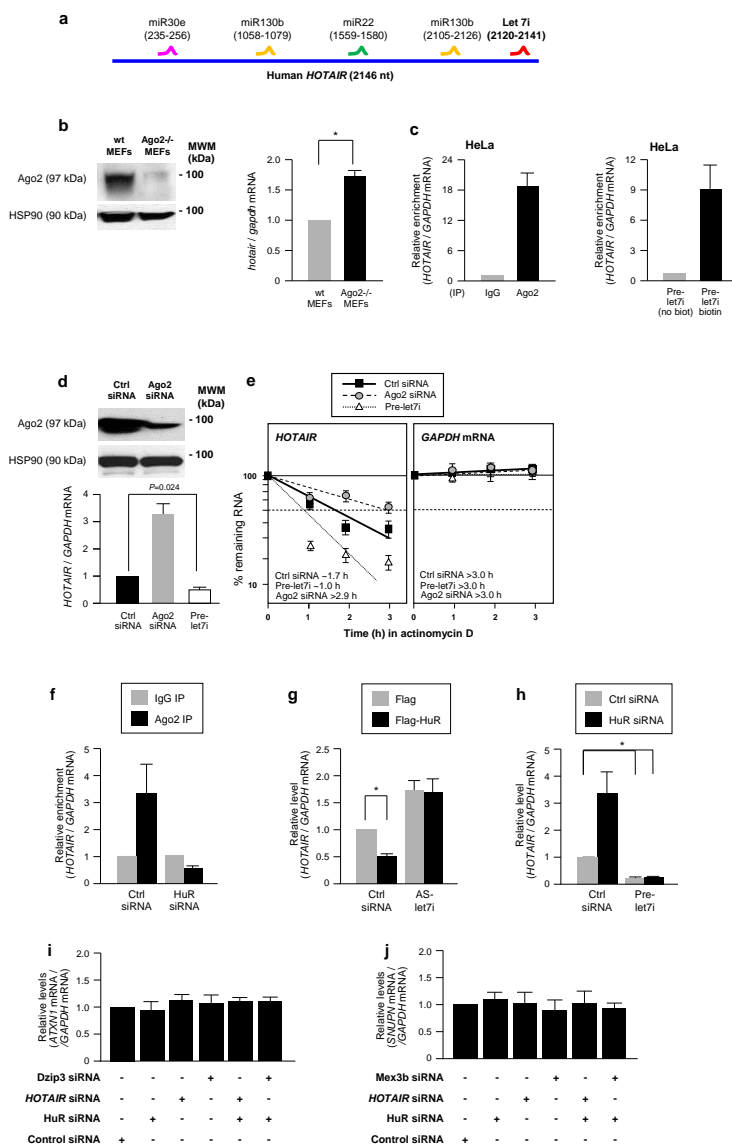

**Supplementary Figure S4. HuR and let7i/Ago2 cooperate in promoting *HOTAIR* decay.** (a) *HOTAIR* sequence with predicted miRNA target sites. (b) In mouse embryonic fibroblasts (MEFs) isolated from Ago2 knockout mice (Ago2<sup>-/-</sup>) or wild type mice (wt), Ago2 and control HSP90 levels were assessed by Western blot analysis (left), and *HOTAIR* levels associated with Ago2 were assessed by RIP analysis followed by RT-qPCR (right). (c) Left, RIP analysis of Ago2-bound *HOTAIR* in HeLa cells. Right, 48 h after transfection of HeLa cells with let7i or biotin let7i, the relative enrichment of endogenous *HOTAIR* in biotin pulldown samples (isolated using streptavidin beads) was assessed by RT-qPCR quantitation of *HOTAIR*. (d,e) Forty-eight hours after silencing Ago2 or overexpressing pre-let7i in HeLa cells (d), the steady state levels and half-life of *HOTAIR* and control *GAPDH* mRNA were assessed as explained in Figure 2f (e). (f) Forty-eight hours after transfecting HeLa cells with HuR siRNA, the association of *HOTAIR* with Ago2 was assessed by RIP and RT-qPCR analysis. (g,h) Forty-eight hours after overexpressing Flag-HuR, silencing HuR, overexpressing let7i or expressing a let7i antagomir (AS-let7i), *HOTAIR* abundance was assessed by RT-qPCR. (i,j) The relative abundance of *HOTAIR*, *ATXN1*, *SNUPN* mRNA, and *GAPDH* mRNA in cells processed as shown in Fig. 4e,f was assessed by RT-qPCR analysis. In (b-j), the graphs reflect the means and S.D. from 3 independent experiments. \*,  $P < 0.05$  using Student's *t*-test. Larger fields of blots are shown in Supplementary Figure S7.

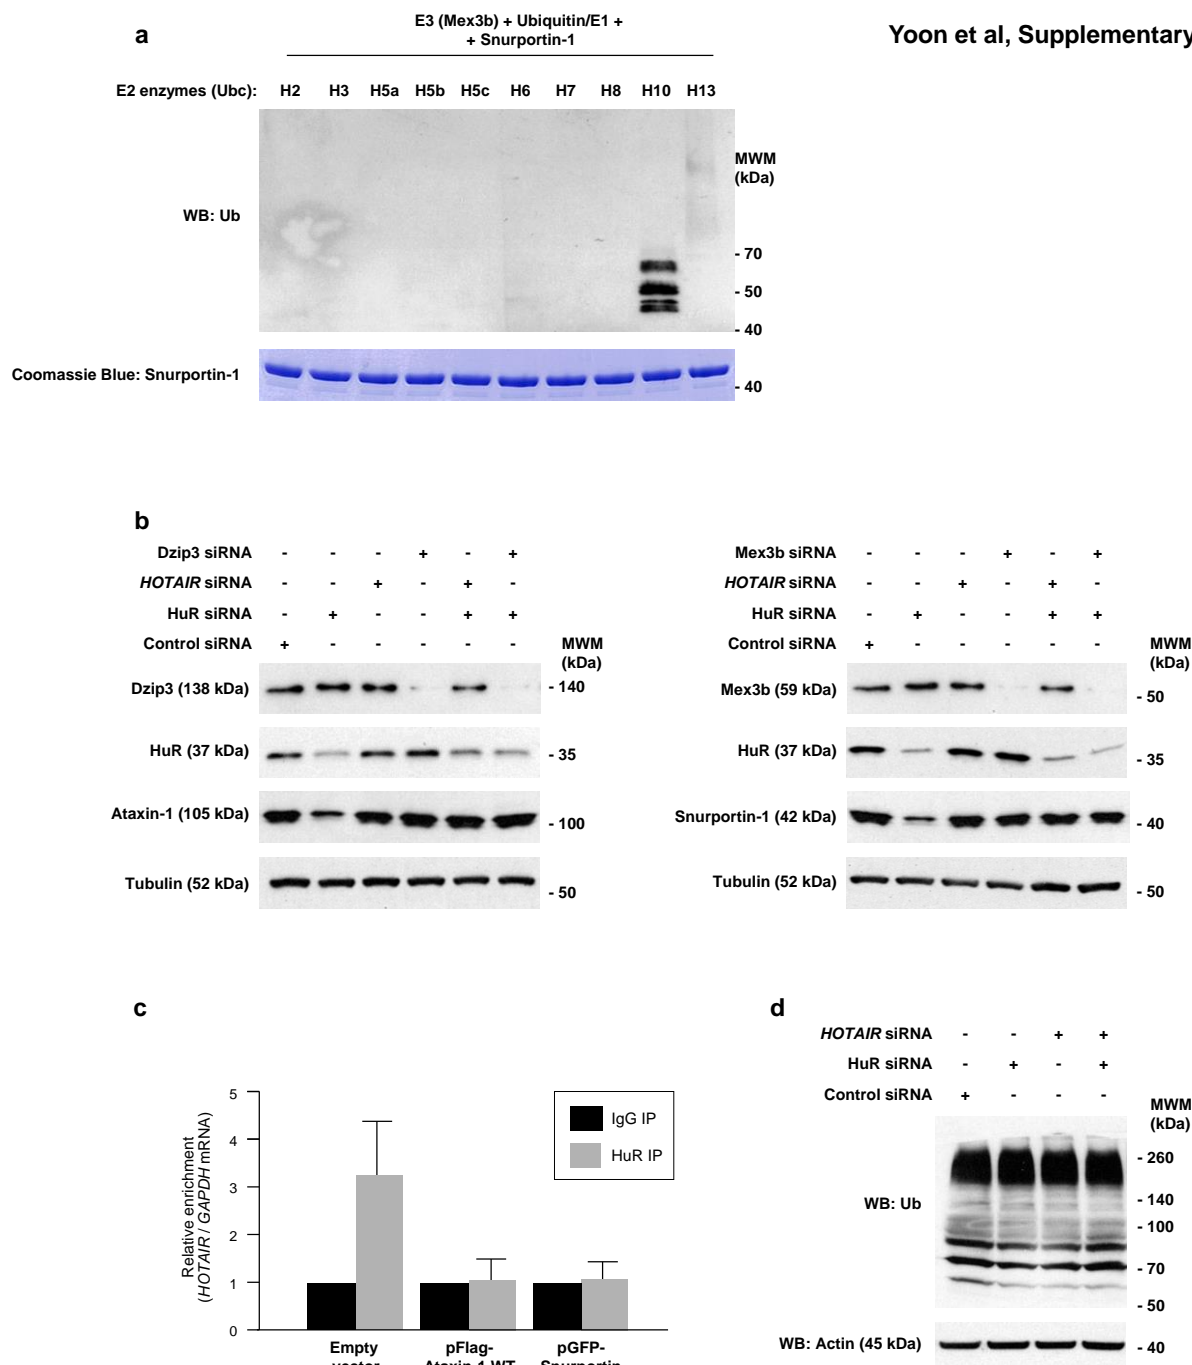

**Supplementary Figure S5. Survey of Ubiquitin conjugating (Ubc) E2 enzymes for Snurportin-1, and analysis of silencing results.** (a) Various E2 Ubc enzymes were assayed for their effect on ubiquitination of Snurportin-1 *in vitro* following the same procedure as that described in the main Fig. 5b. (b) Western blot analysis of the efficiency of silencing HuR, Dzip3, and Mex3b in HeLa cells used to measure the half-lives of Ataxin-1 and Snurportin-1. (c) Relative enrichment of *HOTAIR* compared to *GAPDH* mRNA from HuR IP after overexpression of empty vector, Flag-Ataxin-1 WT, or GFP-Snurportin. Data are the means and S.D. from 3 independent experiments. (d) Western blot analysis to detect ubiquitinated proteins in cell lysates after silencing HuR and/or *HOTAIR*. Larger fields of blots are shown in Supplementary Figure S7.

Yoon et al, Supplementary Figure S6

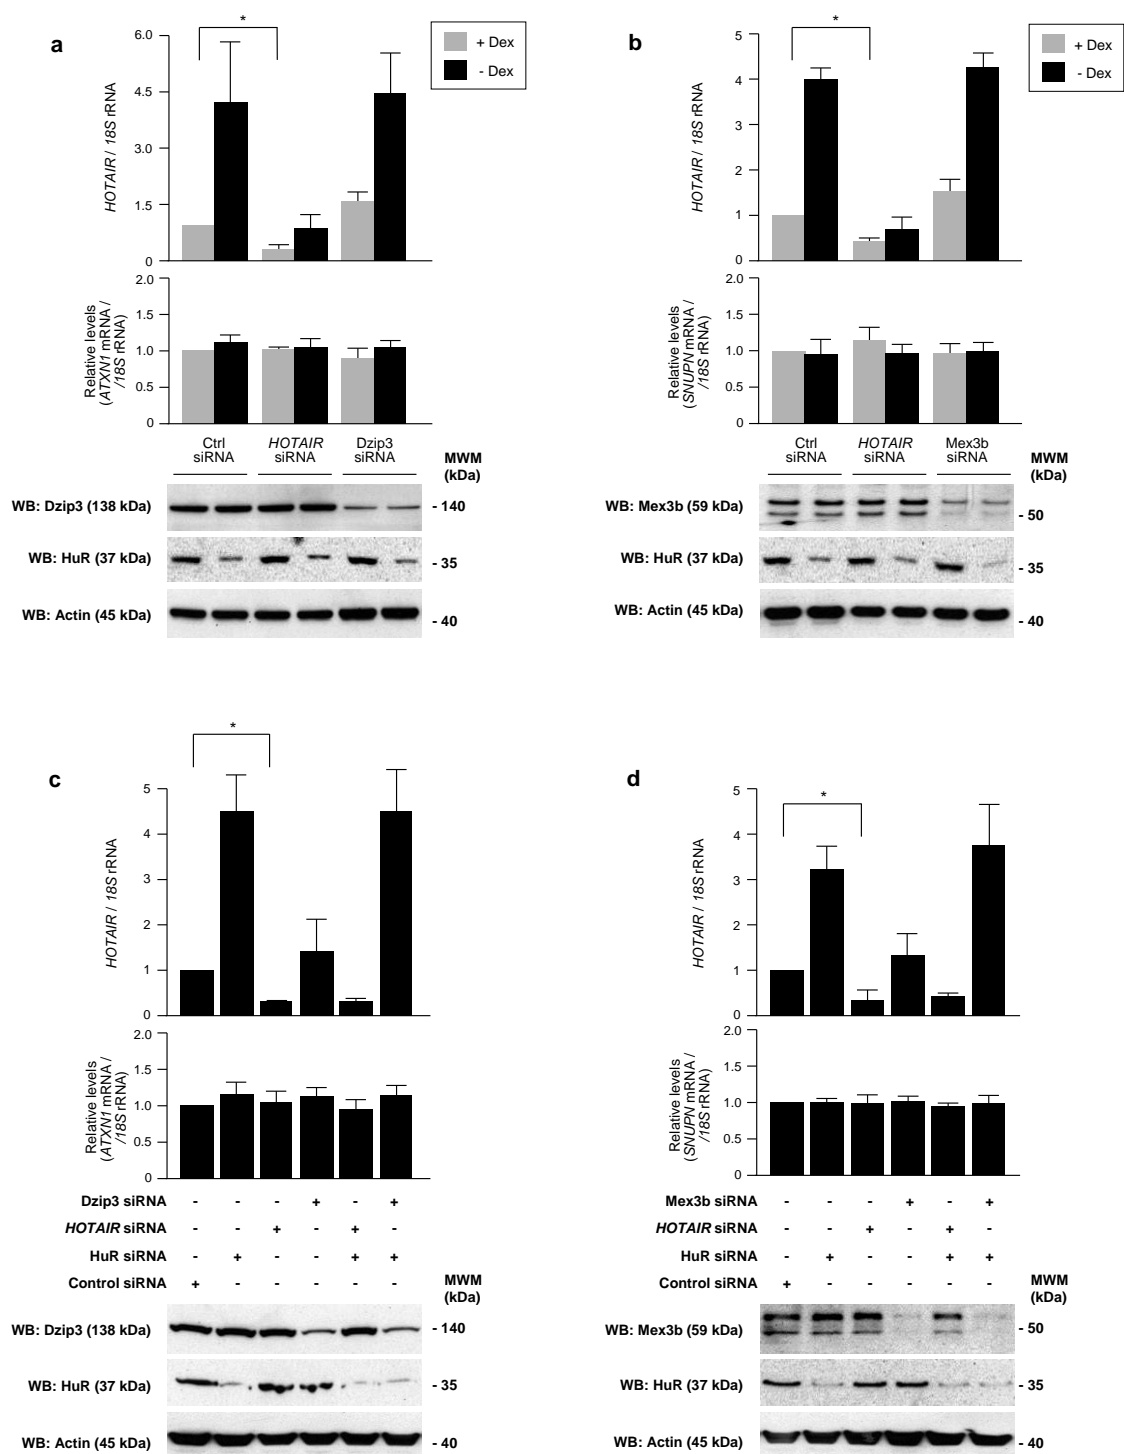

**Supplementary Figure S6. RNA expression in IDH4 cells.** (a,b) IDH4 cells [proliferating (+Dex) or senescent (-Dex)] were transfected as described in Fig. 6e; 5 days later, the levels of *HOTAIR*, *18S* rRNA, *ATXN1* mRNA (a) and *SNUPN* mRNA (b) were quantified and plotted. (c,d) Proliferating IDH4 cells were transfected as in Fig. 8; 48 h later, the levels of *HOTAIR*, *18S* rRNA, *ATXN1* mRNA (c) and *SNUPN* mRNA (d). In (a-d) the graphs reflect the means and S.D. from 3 independent experiments. \*,  $P < 0.05$  using Student's *t*-test. Larger fields of blots are shown in Supplementary Figure S7.

Yoon et al, Supplementary Figure S7

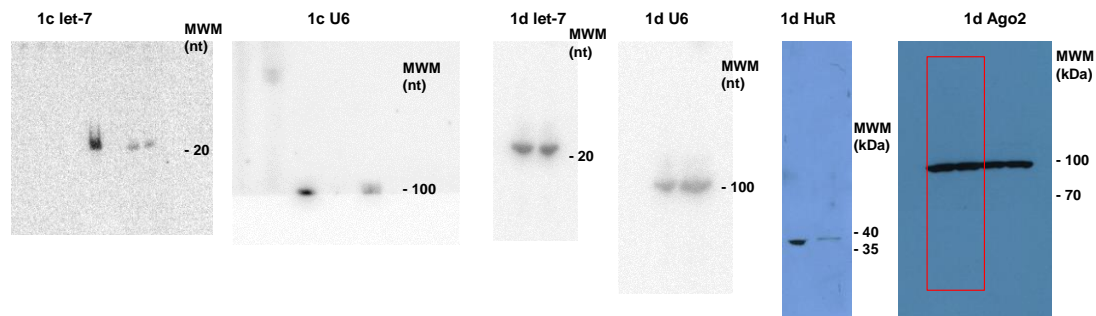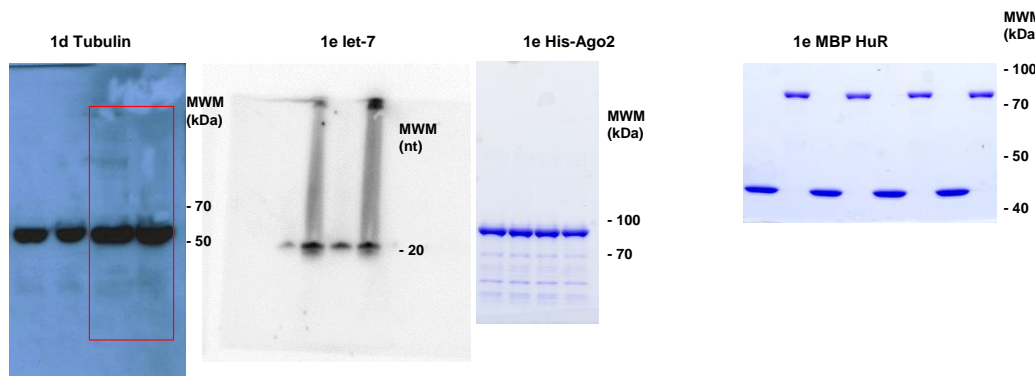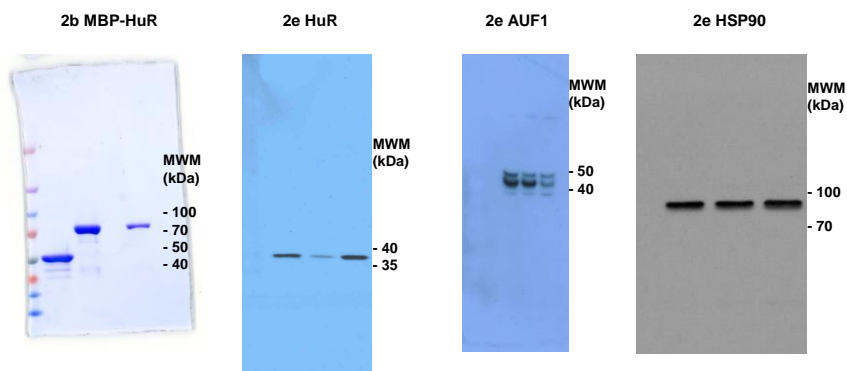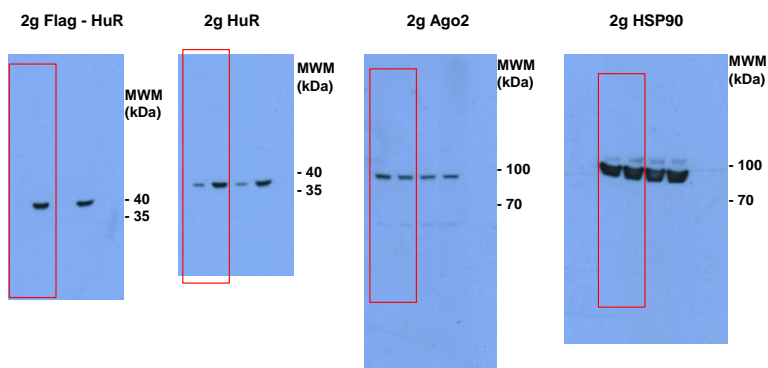



Yoon et al, Supplementary Figure S7

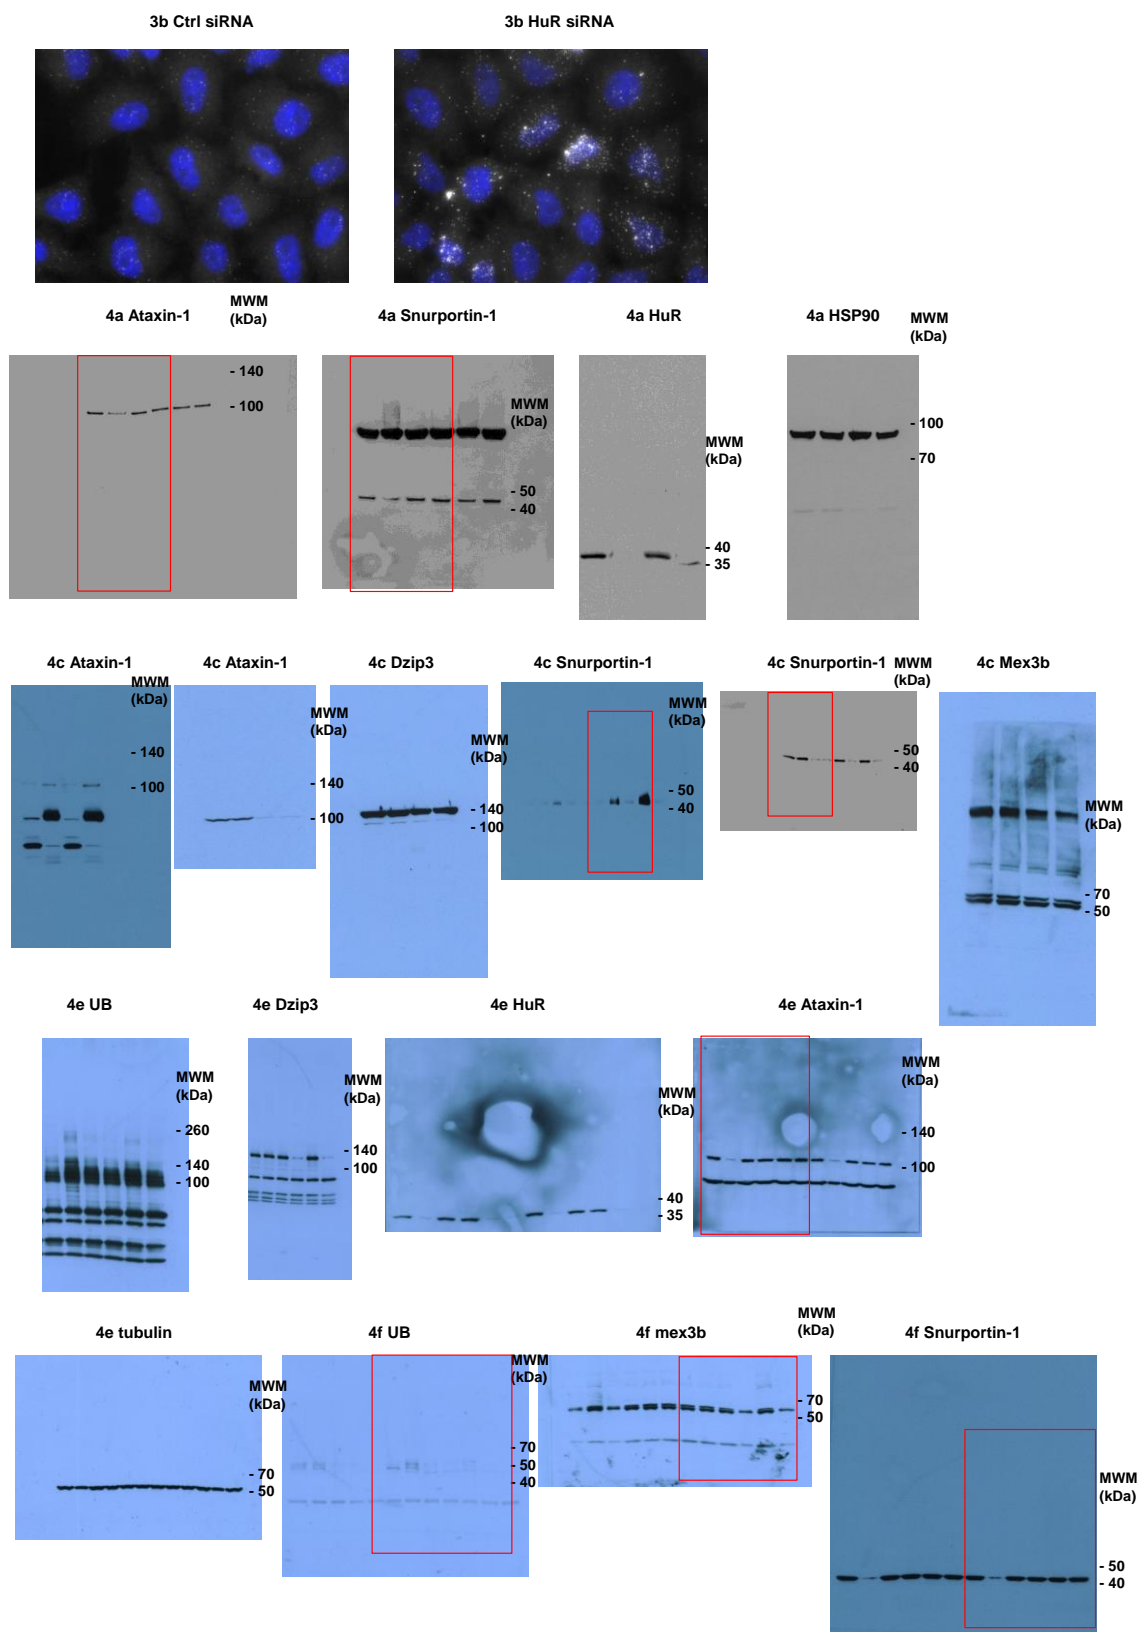

Yoon et al, Supplementary Figure S7

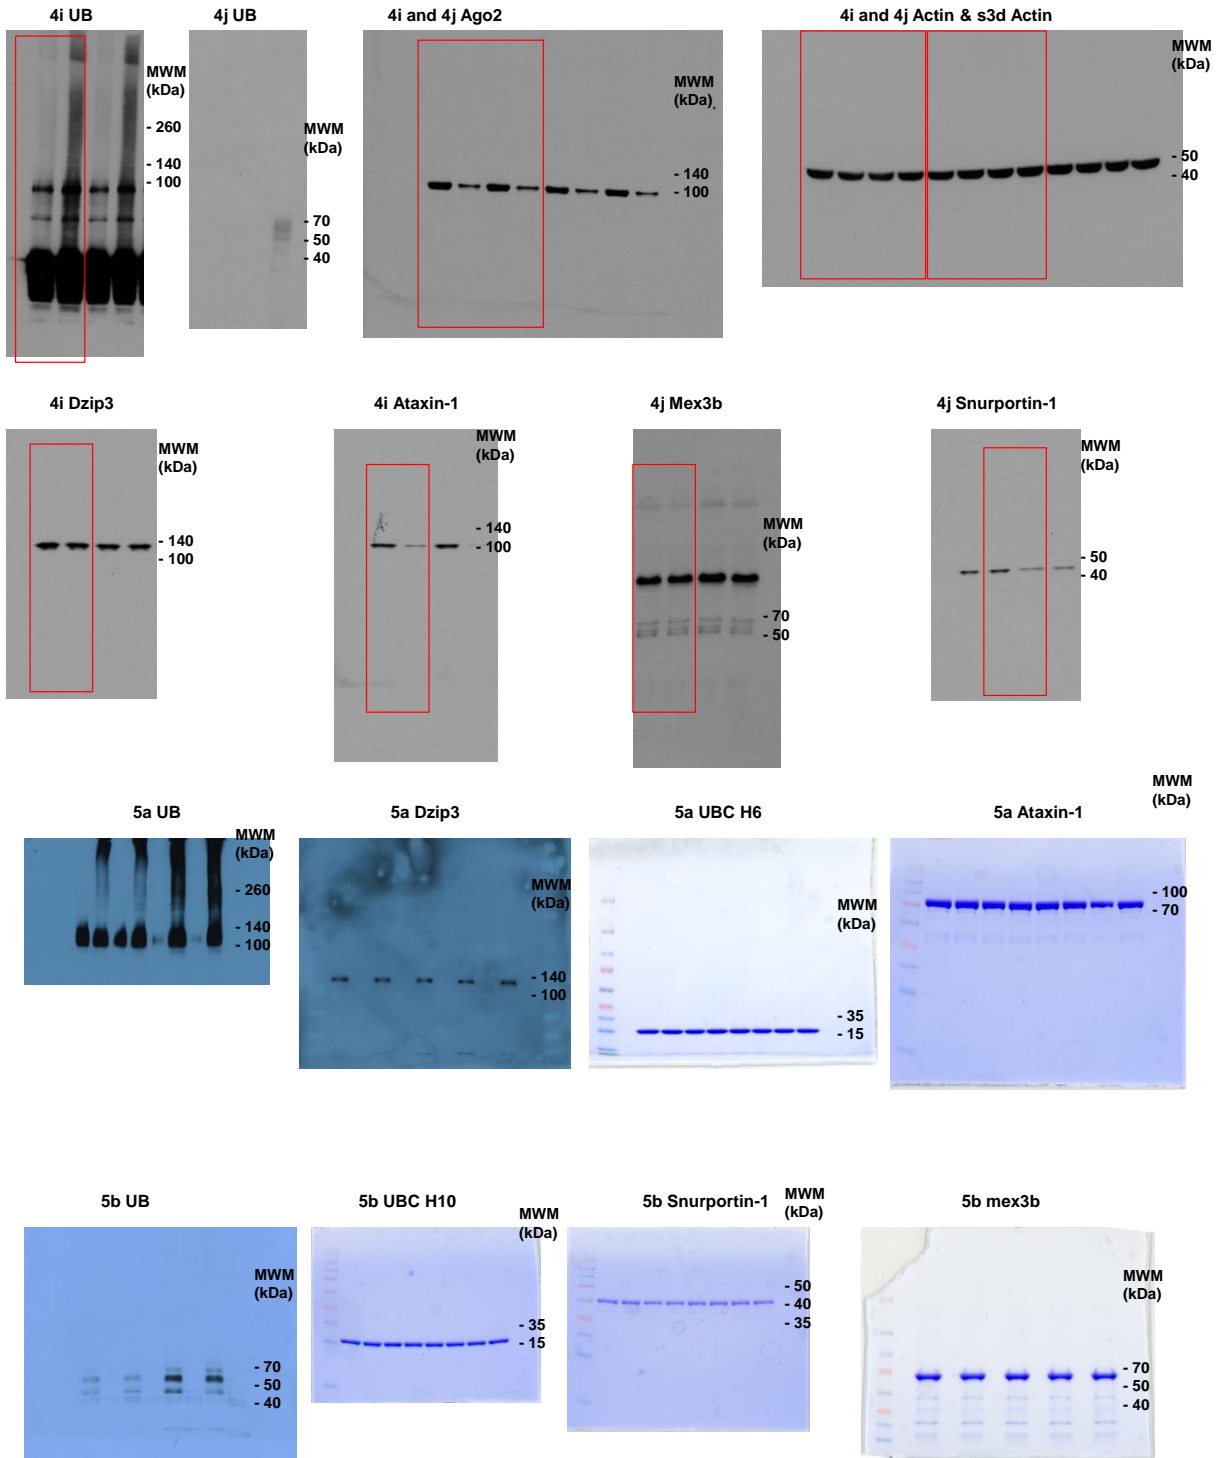

Yoon et al, Supplementary Figure S7

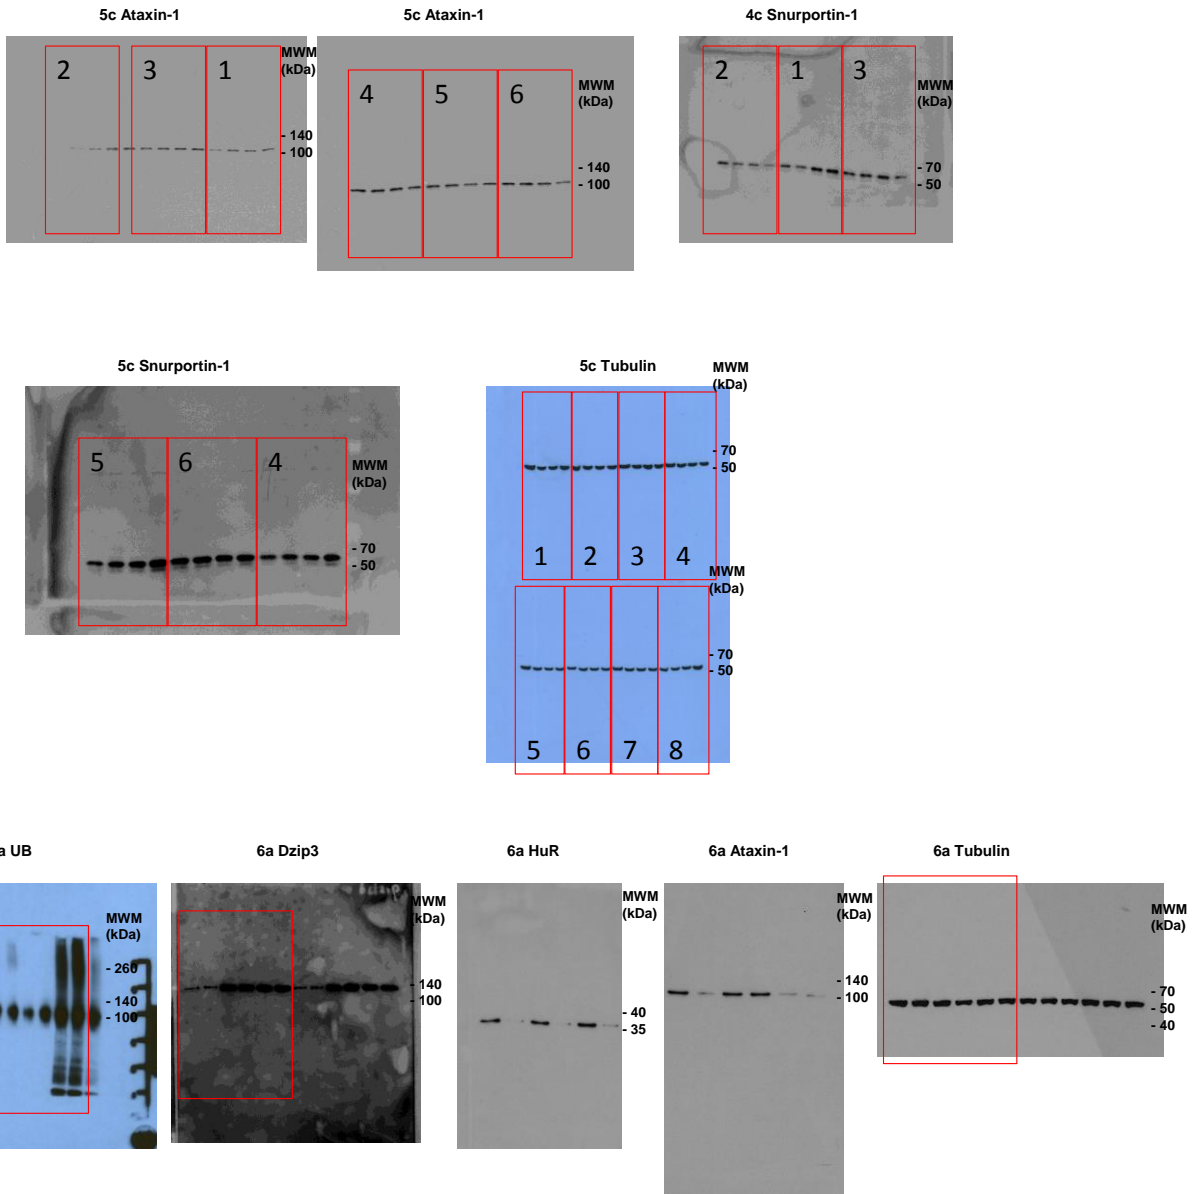

Yoon et al, Supplementary Figure S7

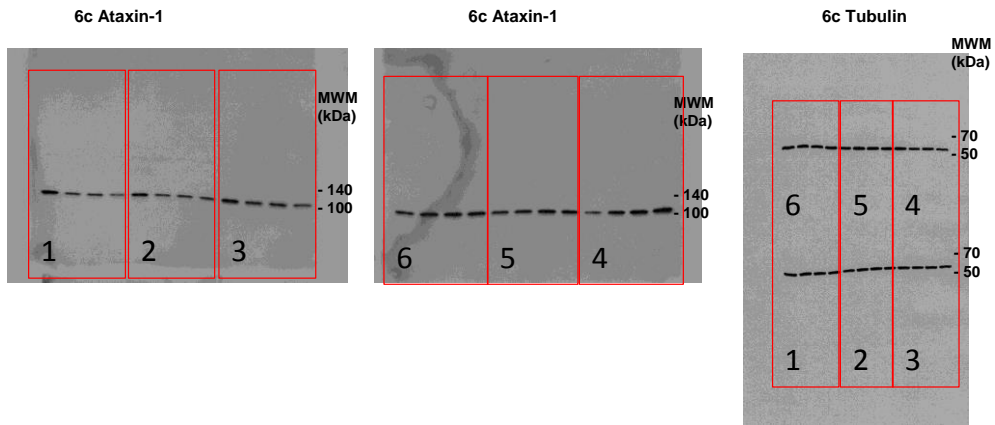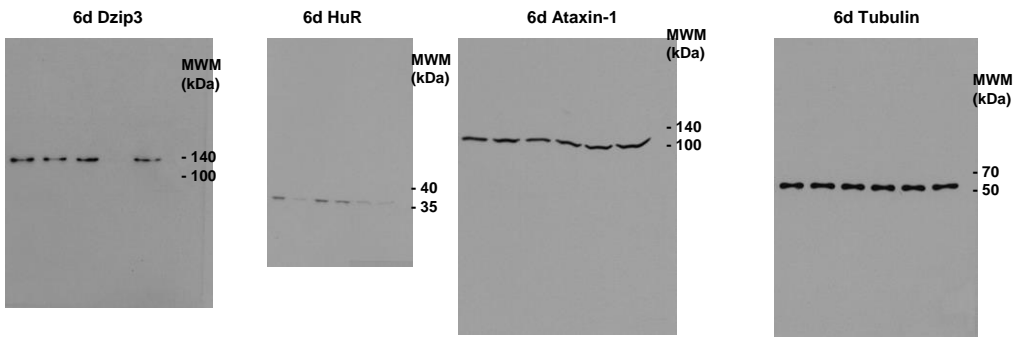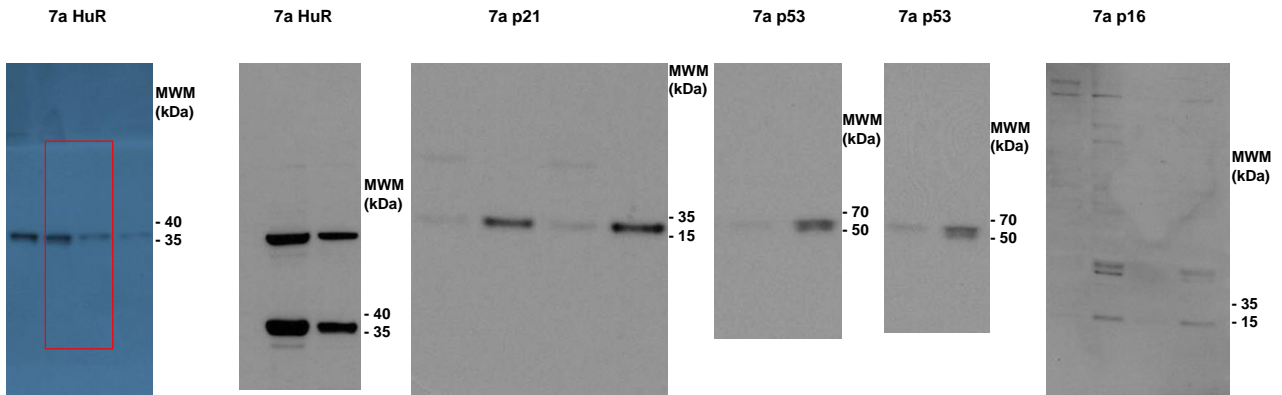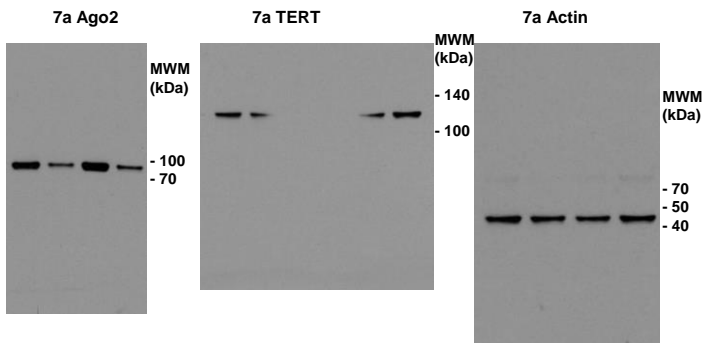

Yoon et al, Supplementary Figure S7

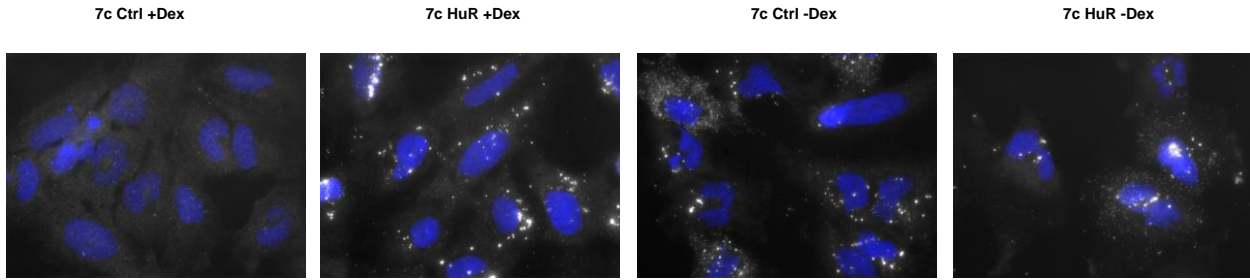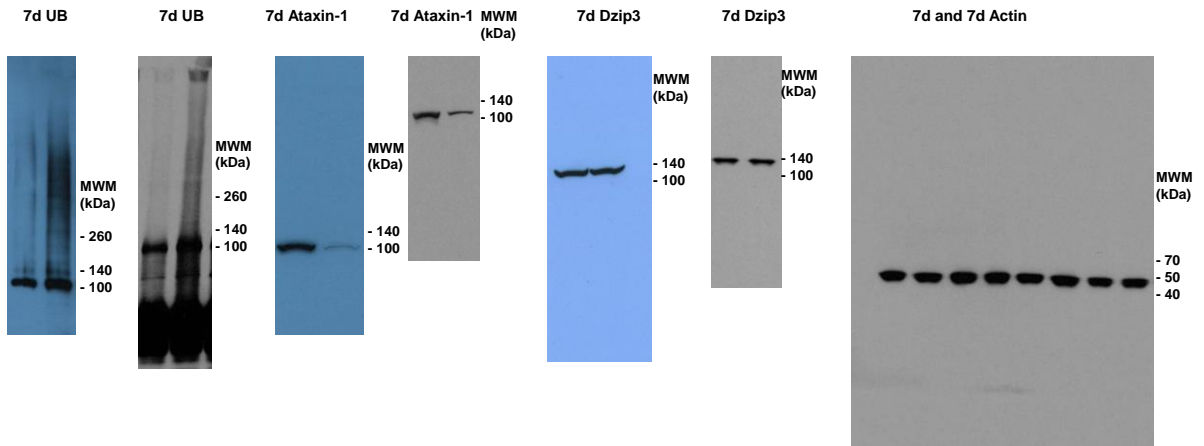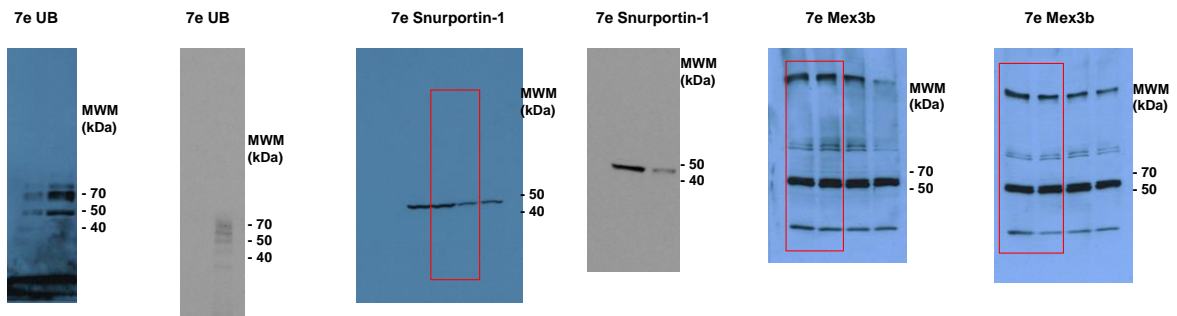

Yoon et al, Supplementary Figure S7

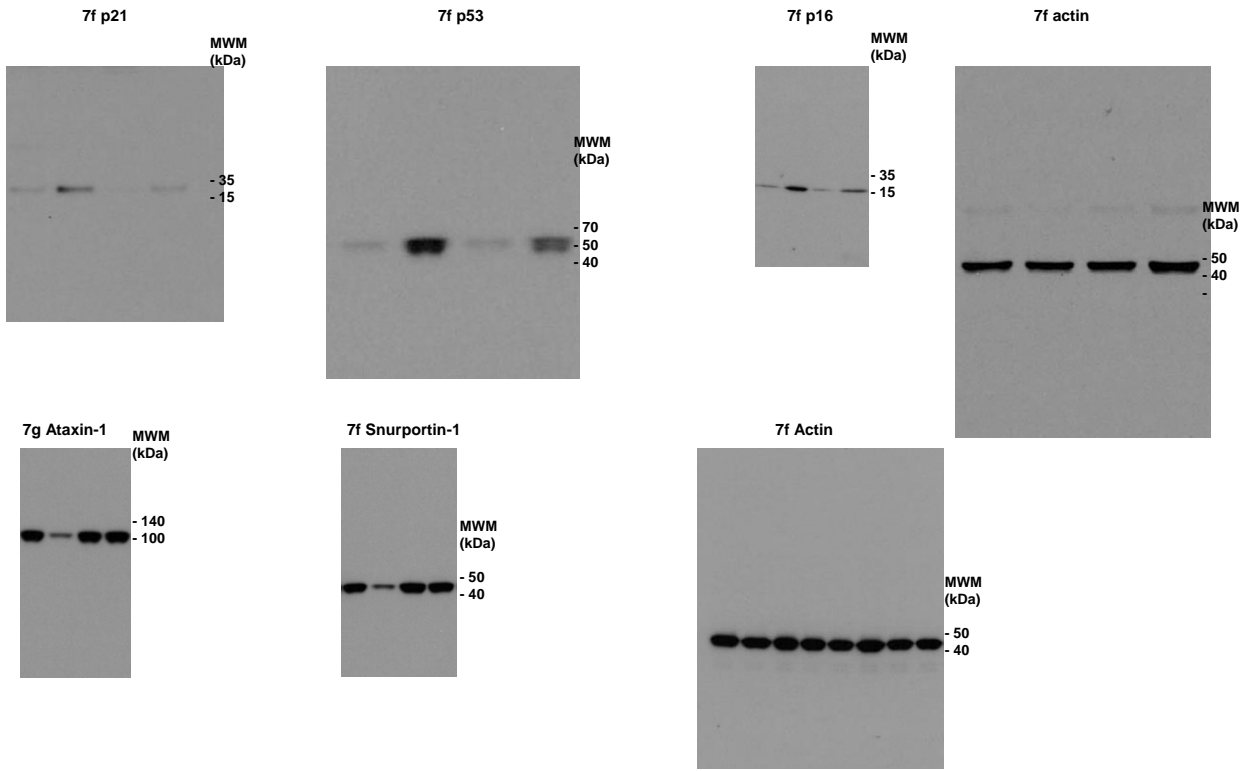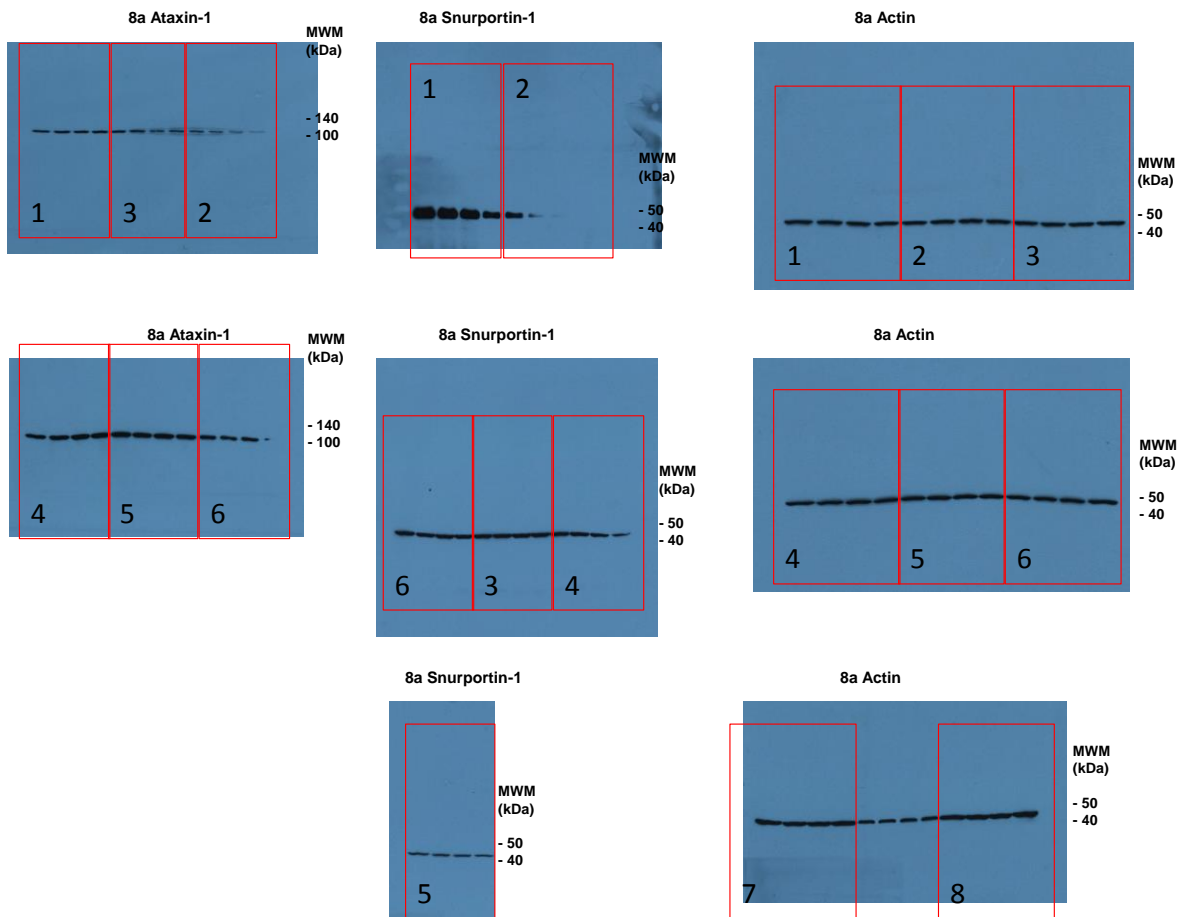

Yoon et al, Supplementary Figure S7

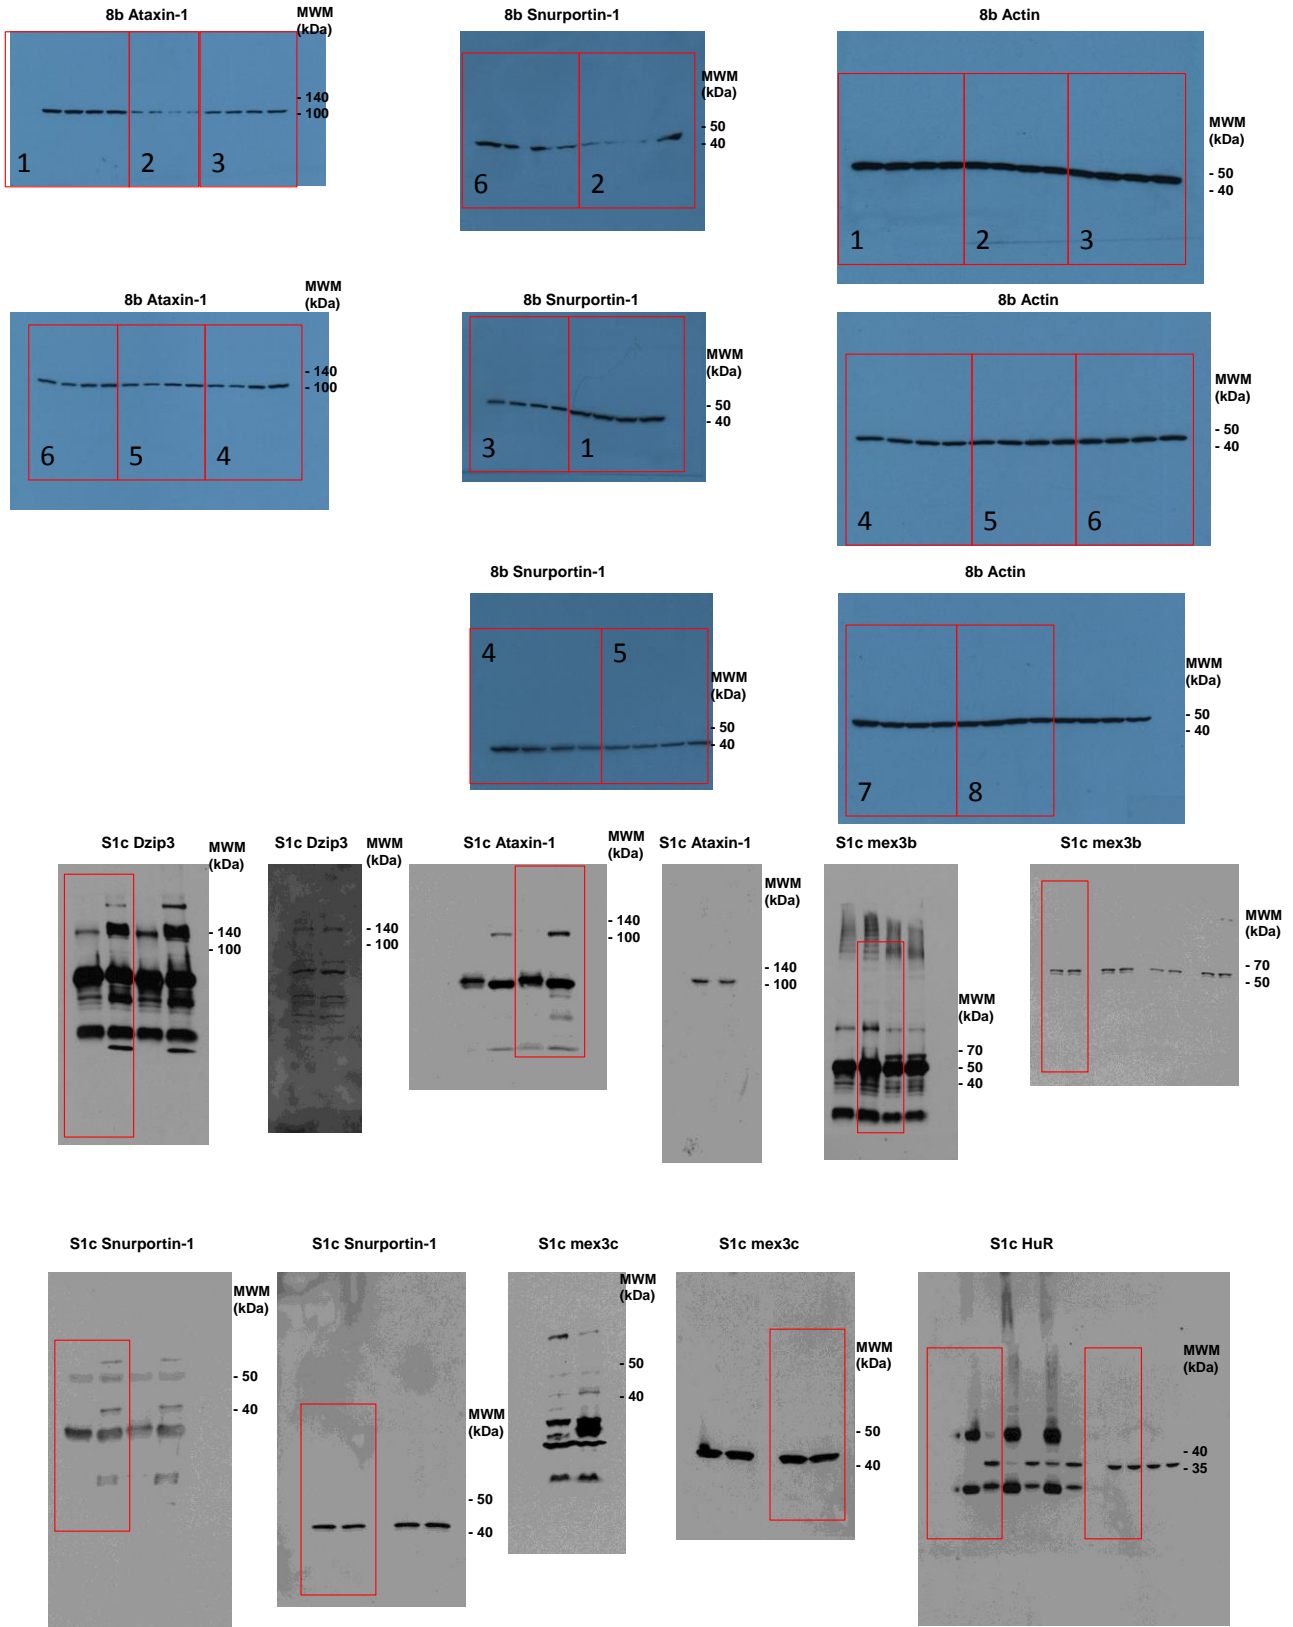



Yoon et al, Supplementary Figure S7

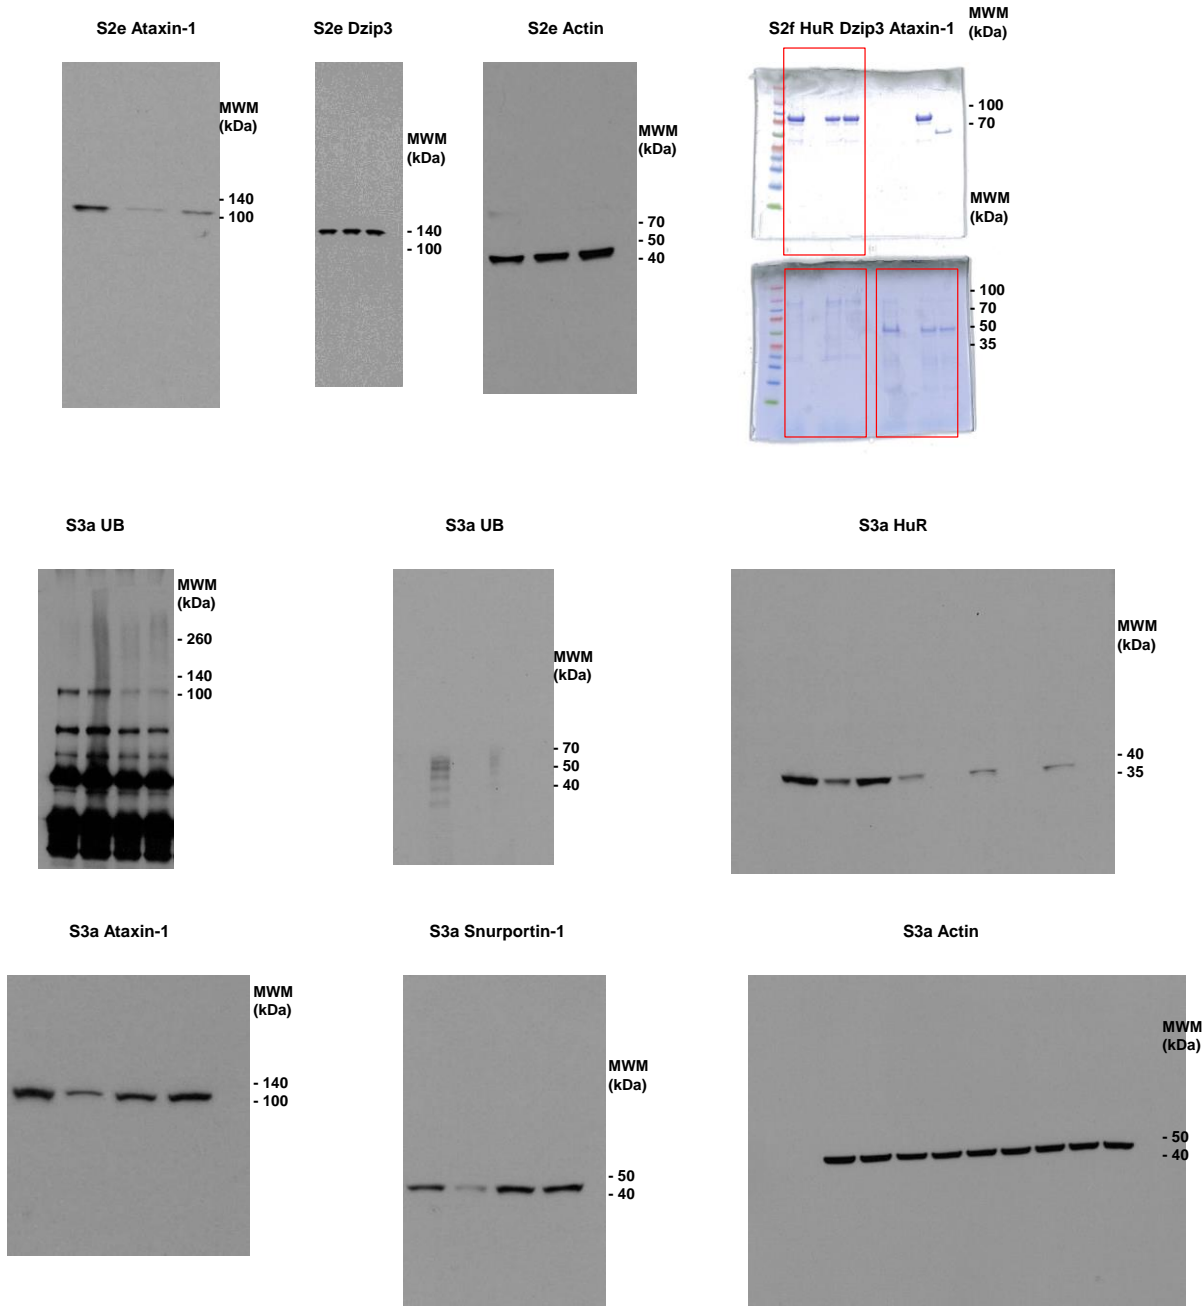

**Supplementary Figure S7. Larger fields of blots shown in the Figures 1-9 and Supplementary Figures S1-S6.** Larger fields of the blots depicted in the main figures are indicated. The corresponding figure and panel, as well as the molecules (proteins or nucleic acids) detected are indicated above each blot. MWM, molecular weight markers [kDa (kilodaltons) or nt (nucleotides)] are indicated. In blots in which only select lanes were used, red rectangles highlight such lanes.



| Name               | Species | Sequence                                                   | Notes                      |
|--------------------|---------|------------------------------------------------------------|----------------------------|
| HOTAIR F           | human   | GGGGCTTCCTTGCTCTTCTTATC                                    |                            |
| HOTAIR R           | human   | GGTAGAAAAAGCAACCAGGAAGC                                    |                            |
| GAPDH F            | human   | AGCCACATCGCTCAGACAC                                        |                            |
| GAPDH R            | human   | GCCCAATACGACCAAAATCC                                       |                            |
| mouse hotair F     | mouse   | TGATATGGCTGCACGAACA                                        |                            |
| mouse hotair R     | mouse   | TCCTGTTCTTGGCATCTCTG                                       |                            |
| mouse gapdh F      | mouse   | GGGAAATCAACGGCACAGT                                        |                            |
| mouse gapdh R      | mouse   | AGATGGTGATGGGCTTCCC                                        |                            |
| let7b              | human   | TGAGGTAGTAGTTGTGTGGTT                                      |                            |
| let7i              | human   | TGAGGTAGTAGTTGTGTGGTT                                      |                            |
| U6 F               | human   | CGCTTCGGCAGCACATATAC                                       |                            |
| U6 R               | human   | AAAAATGGAACGCTTCAACGA                                      |                            |
| ATXN1 F            | human   | TCGGTGGAGCTTGGTTTACAA                                      |                            |
| ATXN1 R            | human   | GGGAGGACCCAAATGAAGTGG                                      |                            |
| SNUPN F            | human   | CAAGCGGCTGGATTATGTGAA                                      |                            |
| SNUPN R            | human   | AGGAACGTCAATTAACCACTCAG                                    |                            |
| 18S rRNA F         | human   | CGAACGCTGCGCCATCAACTT                                      |                            |
| 18S rRNA R         | human   | ACCCGTGGTCCACATGGTA                                        |                            |
| let7 Northern blot | human   | AACCACACAACCTACTACCTCA                                     |                            |
| U6 Northern blot   | human   | AAAAATGGAACGCTTCAACGA                                      |                            |
| GAPDH 3'UTR F      | human   | <b>CCAAGTCTTAATACGACTCACTATAGGGAGA</b> CCTCAACGACCCTTTGTCA |                            |
| GAPDH 3'UTR R      | human   | GGTTGACACAGGGTACTTTTAT                                     |                            |
| HOTAIR 1001 F      | human   | AAAAGGATCC TGAGGCTTGTAAACAAGACCAG                          |                            |
| HOTAIR 1200 R      | human   | AAAAGCGGCGCTTGAGAGACAGTGCACTCACGC                          |                            |
|                    |         |                                                            | <b>HOTAIR</b>              |
|                    |         |                                                            | <b>fragments amplified</b> |
| HOTAIR segment 1F  | human   | GACAGGGTCTGGACAGAAG                                        | 27-144                     |
| HOTAIR segment 1R  | human   | GAGTCAGAGTCCCACTGC                                         |                            |
| HOTAIR segment 2F  | human   | GCAGTGGGGAACCTCGACTC                                       | 125-250                    |
| HOTAIR segment 2R  | human   | GGGTGTTGCTCTGGAACT                                         |                            |
| HOTAIR segment 3F  | human   | AGAGAGCACAGGCACTGAG                                        | 223-380                    |
| HOTAIR segment 3R  | human   | TCCCCTACTGCAGGCTTCTA                                       |                            |
| HOTAIR segment 4F  | human   | CAGTGGAAATGGAAACGATTT                                      | 342-471                    |
| HOTAIR segment 4R  | human   | TCAGACTCTTTGGGCGCTTA                                       |                            |
| HOTAIR segment 5F  | human   | AAGGCCCAAGAGTCTGAT                                         | 453-581                    |
| HOTAIR segment 5R  | human   | CAGGTCCGTAAGGCTTAGG                                        |                            |
| HOTAIR segment 6F  | human   | CTGGCAGAGAAAAGGCTGAA                                       | 505-628                    |
| HOTAIR segment 6R  | human   | CTCCCTCCTCTGGCTCTCT                                        |                            |
| HOTAIR segment 7F  | human   | AGCCAGAGGAGGGAAGAGAG                                       | 613-800                    |
| HOTAIR segment 7R  | human   | TTTTCCCTTTCTCATGGA                                         |                            |
| HOTAIR segment 8F  | human   | GGGCACTCACAGACAGAGGT                                       | 725-881                    |
| HOTAIR segment 8R  | human   | TCAGGTTTTCCAGCGTCT                                         |                            |
| HOTAIR segment 9F  | human   | AGAACGCTGGAAAAACCTGA                                       | 862-991                    |
| HOTAIR segment 9R  | human   | TGGAGATGATAAGGAAGCAAGG                                     |                            |
| HOTAIR segment 10F | human   | GTCAGCCACTGCCCCACAC                                        | 910-1031                   |
| HOTAIR segment 10R | human   | GCCAGCTCTCTGGCTTTGT                                        |                            |
| HOTAIR segment 11F | human   | TGGCCAAAGCACTCTATCTC                                       | 1028-1143                  |
| HOTAIR segment 11R | human   | GTGTAGACGCCCATATTT                                         |                            |
| HOTAIR segment 12F | human   | ACGGAAACCCATGGACTCATA                                      | 1142-1272                  |
| HOTAIR segment 12R | human   | TGGTCCCATTTGGATCTTTC                                       |                            |
| HOTAIR segment 13F | human   | CAAATGTCAGAGGTTCTGGGA                                      | 1217-1324                  |
| HOTAIR segment 13R | human   | TTGGGGAAGCATTTTCTGAC                                       |                            |
| HOTAIR segment 14F | human   | TGGGAGTGTGTTTGTGGGA                                        | 1331-1441                  |
| HOTAIR segment 14R | human   | CTACACAAACCCCTTCGCTTC                                      |                            |
| HOTAIR segment 15F | human   | GAAGCGAAGGGGTTGTAG                                         | 1422-1596                  |
| HOTAIR segment 15R | human   | AGGCTAGGGCTGGTTTCACT                                       |                            |
| HOTAIR segment 16F | human   | CCCTAGCCTTTGGAAGCTCT                                       | 1588-1700                  |
| HOTAIR segment 16R | human   | TGCTCTGTGCTGCCAGTTAG                                       |                            |
| HOTAIR segment 17F | human   | AGGAATCCACCTGCCTGTTA                                       | 1628-1755                  |
| HOTAIR segment 17R | human   | ACCCATGTGTCTCAAGATGC                                       |                            |
| HOTAIR segment 18F | human   | AATGCATCTTGAGACACATGG                                      | 1733-1833                  |
| HOTAIR segment 18R | human   | AGAGTGCAAAAGTCCCGTTTG                                      |                            |
| HOTAIR segment 19F | human   | CAAACGGGACTTTGCACTCT                                       | 1814-1925                  |
| HOTAIR segment 19R | human   | CCCTTCTGTGTCTACATGC                                        |                            |
| HOTAIR segment 20F | human   | GCATGTAGACACAGAAGGGGTA                                     | 1906-2005                  |
| HOTAIR segment 20R | human   | CAGGCATTGGGAATGTGTAAT                                      |                            |
| HOTAIR segment 21F | human   | GCCTGAACCTCCTCTGCTA                                        | 2001-2157                  |
| HOTAIR segment 21R | human   | TGCATACCTACCAATGTATGG                                      |                            |
| HOTAIR segment 22F | human   | TTCCATACATTGGTAGGTATGC                                     | 2134-2236                  |
| HOTAIR segment 22R | human   | GCACAGAAAATGCATCCAGA                                       |                            |
| HOTAIR segment 23F | human   | TCTGGATGATTTTCTGTGC                                        | 2217-2331                  |
| HOTAIR segment 23R | human   | ACCACACACACACAACCC                                         |                            |

Supplementary Table S1. DNA primers used in this study.
